# Supplementary material
Source: publisher figshare collection journal article supplement (https://gsapubs.figshare.com/ndownloader/files/22408836)
Supplement: Supplementary file 1 [file 22408836]

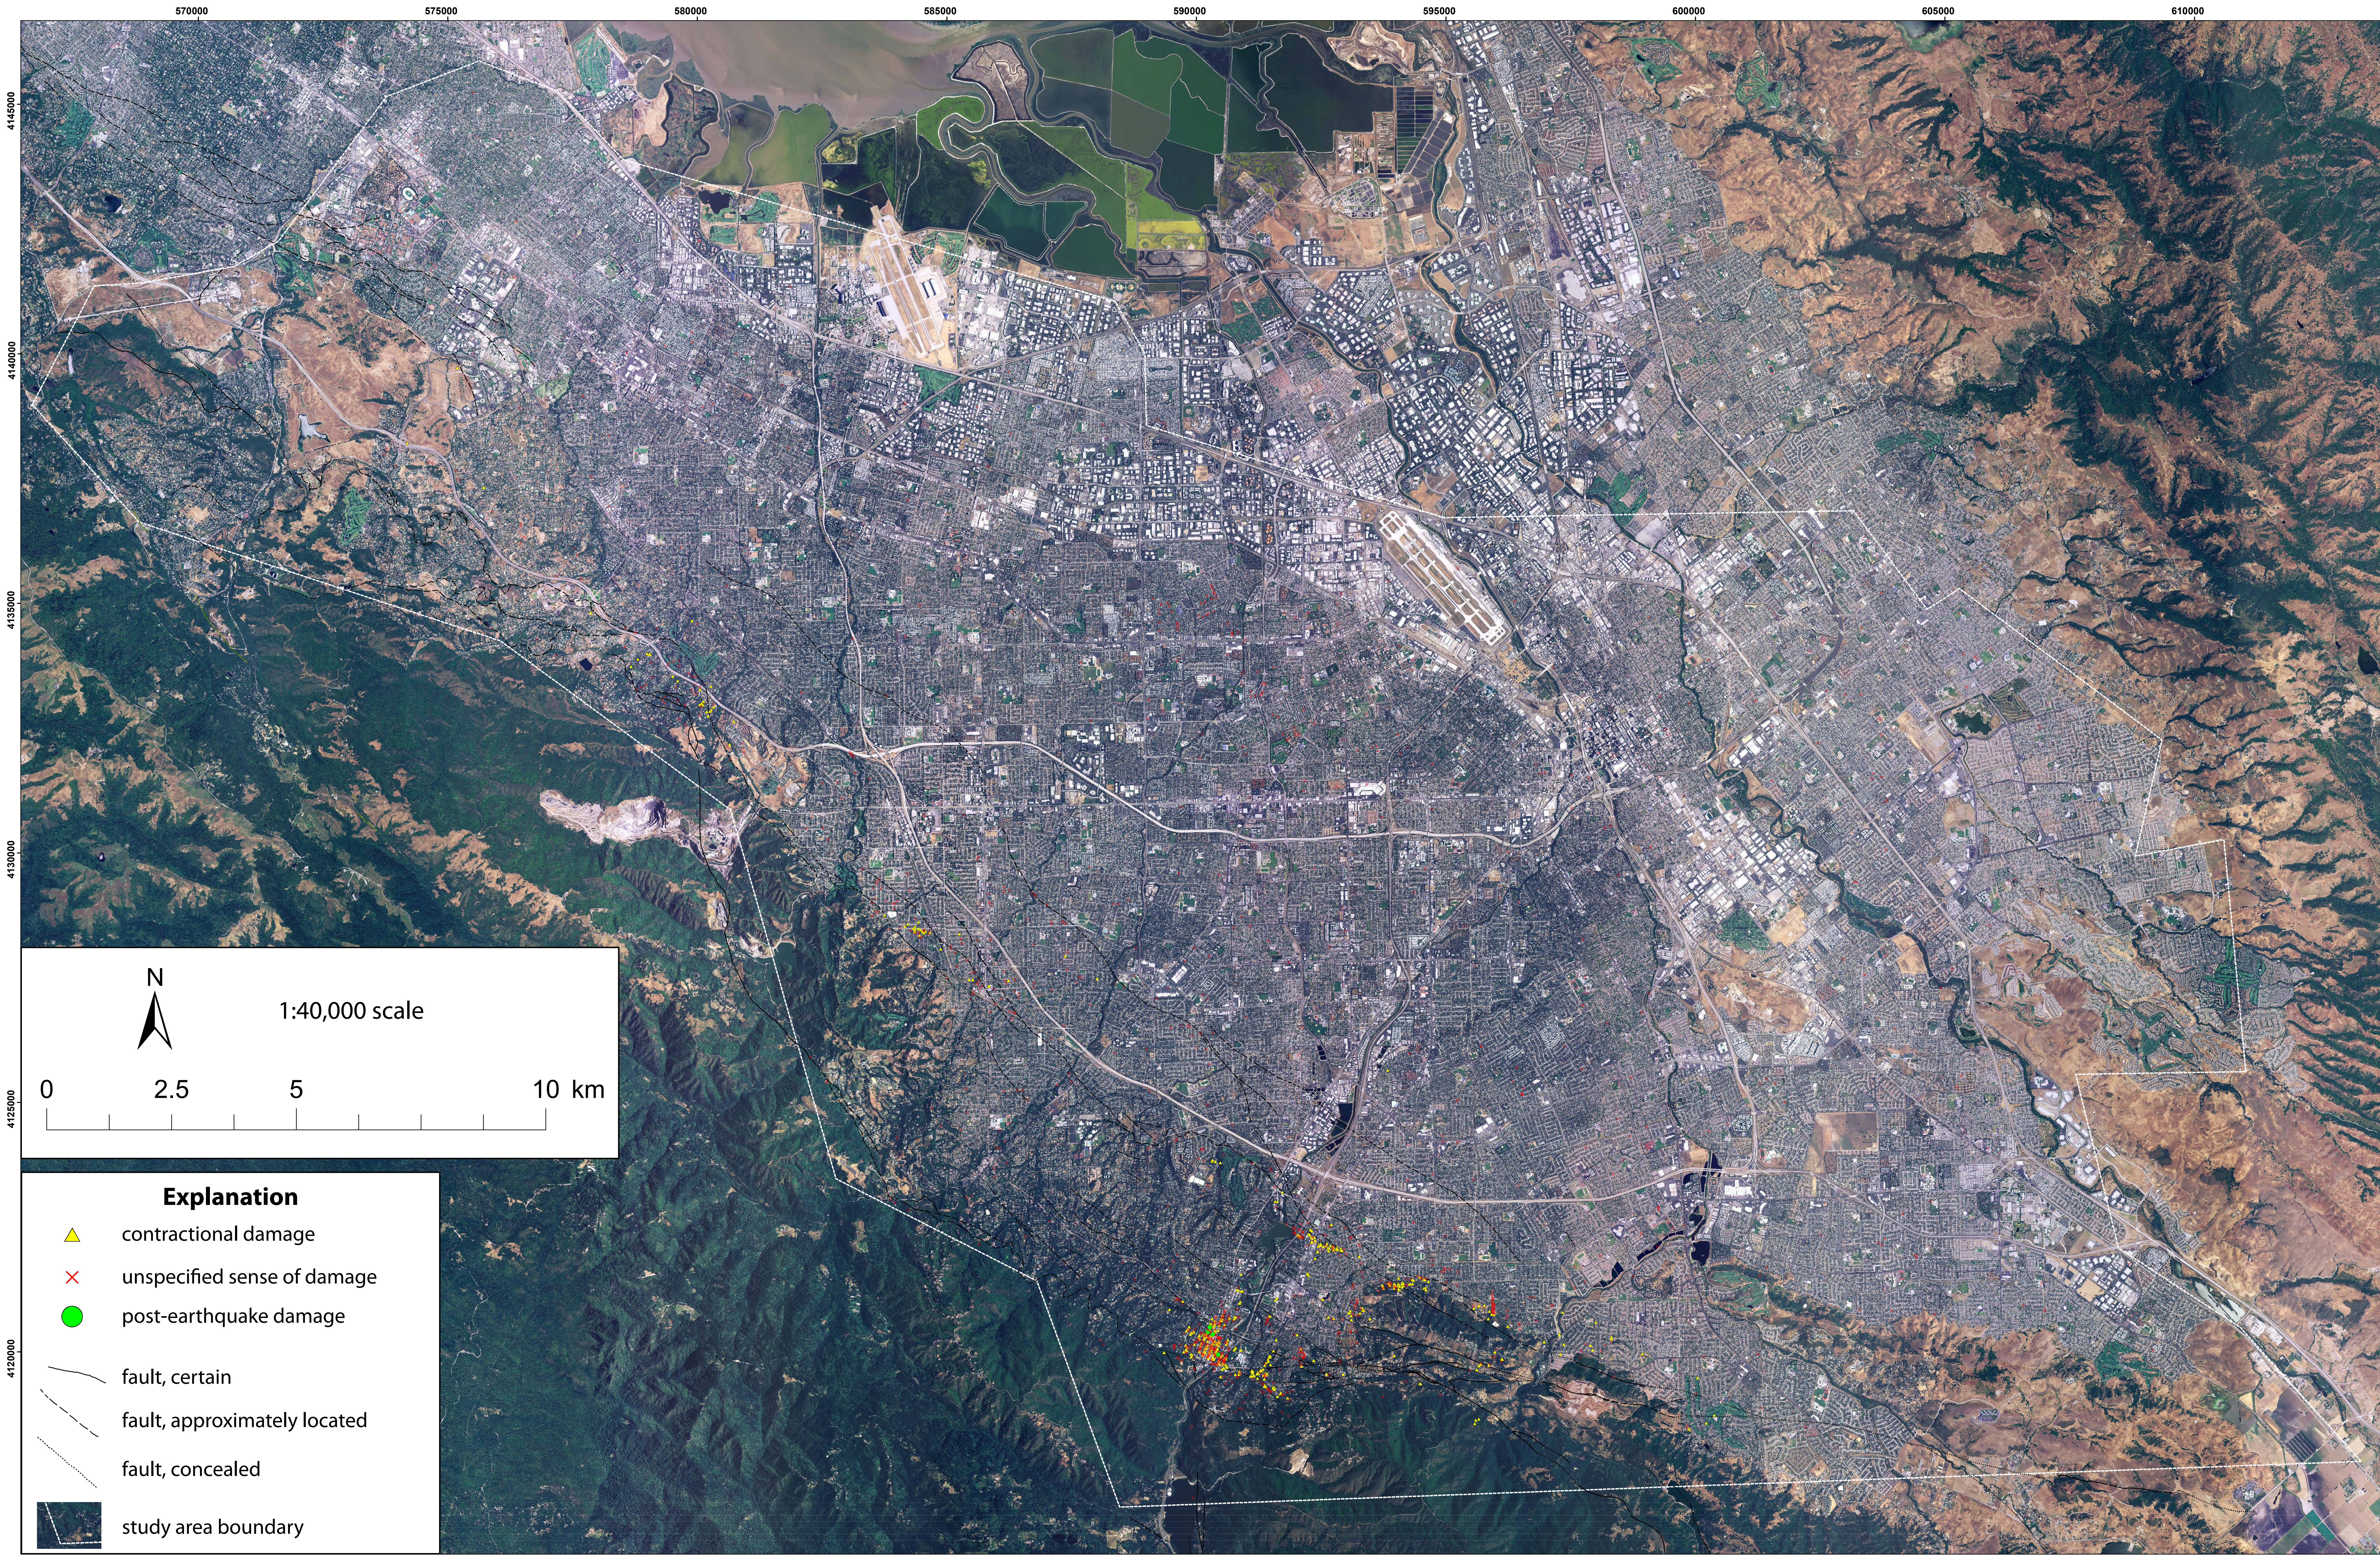

**Deformation from the 1989 Loma Prieta earthquake near the southwest margin of the Santa Clara Valley, California**

by

**K. M. Schmidt, S. D. Ellen, and D. M. Peterson**
